# 1    **Acute and chronic toxicity assessment of benzylpenicillin G residues in** 2    **heat-treated animal food products**

## 3    **Abstract**

4    The current level of penicillin use and its persisting residues in livestock is potentially  
5    concerning; the toxicity of penicillin residues in heat-treated animal food products (HAFP)  
6    is yet to be elucidated. In this study, the acute and chronic toxicity of benzylpenicillin G  
7    (BPG) residues in HAFP was investigated in a mouse model. The calculated LD<sub>50</sub> of BPG  
8    heated to cooking temperature (BPHCT) was 933.04 mg kg<sup>-1</sup> [b.w.] intraperitoneally  
9    corresponding to 3.75 times lower than its prototype. Mice fed on the experimental diet  
10    containing heat-treated beef with high BPG levels for 6 months displayed a reduction in  
11    body weight and altered serum values indicating for liver and renal function. Further, the  
12    organ ratios of intestinal and spleen were increased. Histopathological changes were  
13    observed in the liver, lung and parenchyma testis tissue. BPHCT residue induced sperm  
14    aberration and micronucleated polychromatic erythrocytes formation. Present results  
15    indicate that prolonged exposure of BPHCT at higher levels of residue might have an  
16    impact on public health. Importantly the toxic concentrations of BPHCT are relatively  
17    high compared with levels that would result from the degradation of antibiotic residues in  
18    meat from animals that have received a therapeutic dose of BPG.

19

20

21    **Keywords:** Antibiotic residues; Benzylpenicillin G; High temperature cooking; Acute  
22    and chronic toxicity; Long term exposure.

23

24

25

26

27

## 1. Introduction

The effect of the veterinary drug residues on human health is of increasing concern due to the growing consumption of animal derived products (Baynes et al., 2016). Penicillin, a  $\beta$ -lactam antibiotic, has been widely used in food-producing animals (cattle, pigs and poultry) as a veterinary antibacterial agent to control diseases due to its high bacterial killing efficiency, relatively low toxicity and cost (Edwards and Brownlee, 1946; Dunlop et al., 1998). Penicillins also work as growth promoters to enhance the feed efficiency in animal husbandry (Barton, 2000).

With the development of drug-resistance in bacteria, penicillin is often used at higher dosage rates than those indicated on the manufacture recommendations (Chiesa et al., 2006). The typical dose of penicillin used in cattle by intramuscular injection is approximately 3.5 to 10 times greater than the US approved dose (Payne et al., 2006). It was reported that during the years of 2005-2009, nine countries in the EU consumed a total of 11,342 tonnes antibiotics, of which 18.96% was penicillin, with the majority used in Finland, Netherlands and the United Kingdom (Grave et al., 2012). In 2011, total sales and distribution of penicillin approved for use in food-producing animals was 885 tonnes in the USA (FDA, 2014). In China, 4960 tonnes of penicillin was used in animals during the year of 2013 (Zhang et al., 2015).

With the large amount of penicillin used, there are increased risks of exceeding the Maximum Residue Limit (MRL) range ( $4 \mu\text{g kg}^{-1}$  and  $50 \mu\text{g kg}^{-1}$  in milk and muscle, respectively (Di Corcia and Nazzari, 2002; Commission, 2009)). According to the USDA National Residue Program report, penicillin residues in excess of legal permitted levels were detected in 22% of the total number of violations in the US (Li et al., 2017a). One study reported that in milk, 28% of collected samples were antibiotic positive, of which 11% were considered non-compliant with current European Union

regulations of penicillin (Junza et al., 2014). Becker et al reported that the highest concentration of penicillin residues in bovine kidney and milk were  $1200 \mu\text{g kg}^{-1}$  and  $536 \mu\text{g kg}^{-1}$ , respectively (Becker et al., 2004). In Italy, Ghidini et al. found that the highest concentration of penicillin residues in milk was  $6240 \mu\text{g L}^{-1}$  with the mean concentration of  $510.2 \mu\text{g L}^{-1}$  of collected samples (Ghidini et al., 2003). Samanidou et al. reported that the concentrations of penicillin residues in beef were  $156 \mu\text{g kg}^{-1}$  and  $489 \mu\text{g kg}^{-1}$ , which were collected in Greek local markets (Samanidou et al., 2007). Myllyniemi et al. reported that the number of penicillin residues in kidney and muscle samples above  $400 \mu\text{g kg}^{-1}$  were 10 and 3, respectively, which were from slaughterhouses around Finland (Myllyniemi et al., 2000). Penicillin residues have been reported in chicken from ‘organic’ farms with a concentration of  $1.3 \text{ ng g}^{-1}$ , which was labelled as antibiotic-free in Hong Kong local markets (Li et al., 2017b). In some developing countries, the level of penicillin residues in animal derived products may be under reported due to the lack of quality assurance programs (Kabir et al., 2004; Kang’ethe et al., 2005; Babapour et al., 2012). In addition,  $\beta$ -lactams antibiotics were detected in 10% of the urine samples from children aged 8-9 in China, with the highest concentration of  $40000 \text{ ng mL}^{-1}$  for ampicillin (Wang et al., 2015b).

Penicillin is unstable, with many studies highlighting the heat instability of penicillin in animal derived products. Ludger et al. found that residues from penicillin, penillic, penicilloic and penilloic acids formed in the milk and yoghurt after heat treatment and fermentation by LC-MS/MS detection method (Grunwald and Petz, 2003). Rose et al. suggested that temperature higher than  $65^\circ\text{C}$  would affect the structure of penicillin, making its half life varying from 15 to 60 min leading to generation to penicilloic acid as the major breakdown product in cooked food (Rose et al., 1997). Other studies have reported additional adverse effects of penicillin residues in animal derived products. It

has been reported that penicillin residues in food could cause allergic reaction, which is known to be mediated by IgE antibody and the soluble factor like IL-4 or IL-13 (Pene et al., 1988; Dayan, 1993; Punnonen et al., 1993; Pawankar et al., 1997; Guéant-Rodriguez et al., 2006). Mund et al. reported that some severe clinical symptoms such as dermatitis, cutaneous eruptions, anaphylaxis and gastro-intestinal symptoms in humans were the results of penicillin residues in poultry products (Mund et al., 2016). Aarestrup et al. emphasised that penicillin residues could also facilitate the spread of antibiotic resistance genes from animals to humans through food chain (Aarestrup et al., 2008). To our knowledge, there is only one study that reported the toxicity of one major degradation product of BPHCT-benzylpenicilloic acid, which showed toxicity *in vivo* and *in vitro* (Cui et al., 2018).

In this study, we investigated both acute and chronic toxicity studies in mice to understand the possible adverse effect posed by BPHCT to human health.

## 2. Materials and Methods

### 2.1 Chemicals and reagents

Benzylpenicillin G (BPG, molecular weight: 356.37; 1.6 million units 0.96 g<sup>-1</sup>; CAS No.: 61-33-6; purity >99%) was purchased from North China Pharmaceutical Co., Ltd and stored in a dark and dry place at 4 °C for subsequent tests. Phosphate buffered solution (PBS, Cat. No. PYG0021), poly-lysine treated slides (Cat. No. AR1065), mouse interleukin-4 (IL-4, Cat. No. EK0405) and interleukin-13 (IL-13, Cat. No. EK0425) ELISA Kits were purchased from BOSTER Biological Technology Co. Ltd. China. Mouse immunoglobulin E (IgE, Cat. No. 88-50460-22) ELISA kit was purchased from Thermo Fisher Scientific Co. Ltd, USA.

### 2.2 Preparation of test substance

102 BPG (1.6 million units  $0.96 \text{ g}^{-1}$ ) was dissolved in 2 mL of 0.9% saline solution and  
 103 used for the study. Normal diet containing BPHCT and beef were served as the  
 104 experimental diets and prepared as follows. Briefly, BPG ( $480 \text{ mg mL}^{-1}$ ) was injected  
 105 into raw beef ( $1 \text{ g kg}^{-1} [\text{bw}] \text{ day}^{-1}$ ) at different dose levels and boiled with beef for 20  
 106 min. The details of dose of BPG and weight of beef used in the study are shown in the  
 107 supplementary material. The heat-treated mixtures together with the boiling water were  
 108 all added into the normal diet, mixed evenly and reshaped to form the experimental dry  
 109 diets. Normal diet mixed with heat-treated beef and 0.9% saline solution was employed  
 110 as the negative control.

### 111 **2.3 Animals**

112 ICR mice were obtained from Laboratory Animal Centre of Jilin University. The  
 113 animals were 23-25 g in weight and clinically examined to rule out any ailment and  
 114 only ones without any signs of diseases were employed in the further study. Mice were  
 115 housed at  $22 \pm 1^\circ \text{C}$ , 50%-70% humidity and artificial lighting was on 12 h day and night  
 116 cycle. Mice were fed with the normal diet and unlimited water. An adaptation period of  
 117 at least 7 days was employed before the start of actual dosing. The animal experiments  
 118 studies were approved by the Animal Care and Use Committee of Changchun  
 119 Experimental Animal Centre, Jilin University. The experiments were designed and  
 120 conducted in compliance with the OECD Principles and Good Laboratory Practice  
 121 (GLP).

### 122 **2.4 Analysis of the BPHCT**

123 UPLC-MS/MS method was employed to analyse the degradation products of  
 124 BPHCT. The details of the method are shown in the supplementary material.

### 125 **2.5 Acute toxicity study in mice**

The acute intraperitoneal toxicity study for calculating LD<sub>50</sub> was carried out according to the OECD423 guideline (OECD(2002)) and Kaber's method (Wang et al., 2010) with modification. The doses of BPHCT used in oral and intraperitoneal acute tests were calculated according to the original concentration of BPG solution (480 mg mL<sup>-1</sup>). Mice were administered by gavage with the doses of 5 mg kg<sup>-1</sup>, 50 mg kg<sup>-1</sup>, 500 mg kg<sup>-1</sup>, 1000 mg kg<sup>-1</sup>, 1500 mg kg<sup>-1</sup>, 2000 mg kg<sup>-1</sup> and 5000 mg kg<sup>-1</sup> or injected intraperitoneally with a dose level of 648.00 mg kg<sup>-1</sup>, 777.60 mg kg<sup>-1</sup>, 933.12 mg kg<sup>-1</sup>, 1119.74 mg kg<sup>-1</sup> and 1343.69 mg kg<sup>-1</sup> of BPHCT. The negative control groups were given a 0.9% normal saline solution. After 14 days observation, mortality caused by oral administration or intraperitoneal injection was calculated. The surviving mice were sacrificed for organ necropsy. To obtain the LD<sub>50</sub> value and 95% confidence intervals, the following formula was used according to the Kaber's method with modifications (Wang et al., 2010).

$$LD_{50} = \log^{-1}[x_m - i(\Sigma p - 0.5)]$$

$$X = \log^{-1}(\log LD_{50} \pm 1.96 \times i \sqrt{\frac{\Sigma p(1-p)}{n}})$$

x<sub>m</sub>: dosage logarithm for the maximal dosage; i: the difference of dosage logarithm between two nearest groups; p: death rate of mice in each group; X: 95% confidence intervals; n: the number of the mice in each group.

## 2.6 Six months chronic toxicity study

### 2.6.1 Experimental design

A total of 80 mice were randomly allocated into 4 groups (10 females and 10 males per group) and five mice were housed in each cage under the same conditions as

described above. All mice were fed with the experimental diets every day. The weight of experimental diets provided was calculated based on the mice body weight. If the experimental diets were completely consumed before the end of a day, the normal diet would be supplied without restriction for the rest of the day. During the 6 months test period, body weight of mice was measured every 3 days in the first month and weekly during the rest of the study period.

#### 2.6.2 *Clinical observation and mortality*

Mice were observed twice a day for changes in fur, eyes, behaviour patterns (e.g., changes in gait or posture), morbidity and mortality, during the course of the experiment.

#### 2.6.3 *Serum biochemical parameters analysis*

Blood from the mice was collected in plain tubes peacefully after overnight fasting. The obtained blood was centrifuged at 3500 rpm for 10 min at 4°C and the serum was carefully transferred to a new tube and stored at -20°C for the subsequent analysis. The serum was analysed by BECKMAN COULTURE UniCelDxC 800 synchron clinical system. The clinical biochemical parameters of mice were determined including blood urea nitrogen (BUN), creatinine (CREA), total cholesterol (TC), total bilirubin (TBIL), direct bilirubin (DBIL), indirect bilirubin (IBIL), total protein (TP), albumin (ALB), globulin (GLO), alanine aminotransferase (ALT), aspartate aminotransferase (AST), alkaline phosphatase (ALP), glucose (GLU), cholinesterase (CHE), sodium (NA) and potassium (K). The contents of IgE, IL-4 and IL-13 in serum were measured by the corresponding ELISA kits.

#### 2.6.4 *Histopathology*

171 The mice were dissected to necropsy check. The organs including brain, heart, lungs,  
172 liver, spleen, kidneys, intestine and testis were carefully collected and examined  
173 macroscopically for gross lesions. The epididymides from male and femurs from female  
174 mice were also collected for the subsequent experiments. All the organs were weighted  
175 in order to calculate the ratios of organ-to-body weight and then the organs from each  
176 mouse were kept in 10% formalin for hematoxylin and eosin (HE) staining. Histological  
177 changes were examined under a light microscope.

#### 178 *2.6.5 Sperm aberration assay*

179 In this assay, the epididymides from male mice were cut into pieces in PBS (pH 7.2)  
180 and smears were prepared according to the method described previously (Wyrobek and  
181 Bruce, 1975). The abnormal sperms were scored and the aberration ratios were  
182 calculated.

#### 183 *2.6.6 Polychromatic erythrocyte micronucleus formation assay*

184 The femurs from female mice were prepared according to the method described  
185 previously (Tang et al., 2012). The polychromatic erythrocytes on the slides were  
186 observed using a light microscope. The micronucleus rates in each group were  
187 calculated.

### 188 **2.7 Statistical analysis**

189 Data was analysed with SPSS 20.0 program and the difference between the treatment  
190 groups and the control groups was compared. Homogeneity of variances was calculated  
191 using Levene's test. If the variance was homogeneous, a one-way analysis of variance  
192 (ANOVA) was used to analyse the data. Otherwise, if the variance was not homogenous  
193 ( $p \leq 0.05$ ), the identification of the statistical significance of the individual groups was  
194 tested by Dunnett's. If the data variable is not normally distributed as required for



195 ANOVA, Kruskal-Wallis test were performed. The statistically significance was  
196 considered to be  $P < 0.05$ . Values were expressed as means  $\pm$  SD.

### 197 **3. Results**

#### 198 **3.1 BPHCT analysis**

199 There were five major degradation products of BPHCT, which were  
200 benzylpenicillenic acid, N-(phenylacetyl)glycine, isobenzylpenillic acid,  
201 benzylpenillic acid and benzylpenicilloic acid. Some under baseline chromatographic  
202 peaks were observed, which might be dimer or different combination polymers of  
203 generated degradation products of BPHCT. The results are shown in the  
204 supplementary material (Supplementary Figure 1, 2 and Supplementary Table 2).

#### 205 **3.2 Acute toxicity study**

206 There was no mortality found in the oral toxicity test. Regarding observational  
207 studies, mice exhibited static, huddled up behaviour, and showed asthenia. Interestingly,  
208 mice preferred water to food in the first hour and these clinical symptoms would last for  
209 a few hours and disappear before the following day, which was correlated in a dose-  
210 dependent manner. A dose level of  $1000 \text{ mg kg}^{-1}$  was established as the no-observed-  
211 adverse-effect level (NOAEL), while the lowest-observed-adverse-effect level  
212 (LOAEL) was  $1500 \text{ mg kg}^{-1}$  for the acute oral toxicity. In the acute intraperitoneal  
213 toxicity, the symptoms of BPHCT injected mice were similar with those in the acute  
214 oral toxicity study, but some mice in the high dose group had also showed dyspnoeic  
215 symptoms or shock. The calculated  $\text{LD}_{50}$  value was  $933.04 \text{ mg kg}^{-1}$  [b.w.] and the 95%  
216 confidence intervals were  $856.72\text{-}1016.15 \text{ mg kg}^{-1}$  (Table 1).

217

218 Table 1. Acute toxicity of BPHCT administered through intraperitoneal injection in  
219 mice

| Dose level (mg kg <sup>-1</sup> ) | Number of tested animals | Number of dead animals |
|-----------------------------------|--------------------------|------------------------|
| 648.00                            | 10                       | 0                      |
| 777.60                            | 10                       | 2                      |
| 933.12                            | 10                       | 5                      |
| 1119.74                           | 10                       | 8                      |
| 1343.69                           | 10                       | 10                     |

220

### 221 3.3 Chronic toxicity study

#### 222 3.3.1 Effect of chronic BPHCT administration on the morbidity, mortality and body 223 weight

224 Of the cohort, one female mouse and one male mouse were found crawling in circles  
225 around the cage continuously in the 60× and 600× dose group after 2 months feeding;  
226 this symptom lasted two weeks in the mouse in the 60× dose group, while it occurred in  
227 the mouse in the 600× dose group intermittently for the rest of the test. Mice in 600×  
228 dose group seemed abnormally active. At the end phase of the study, there was not a  
229 single mouse found to be dead due to drug induced toxicity.

230 There was a significant decrease in body weight in the female test mice compared  
231 with those in the control group (Figure 1). In the male mice, the decreased body weight  
232 was only found in the 600× dose group while increased body weight was found in the  
233 6× and 60× dose groups compared with those in the control group.

234

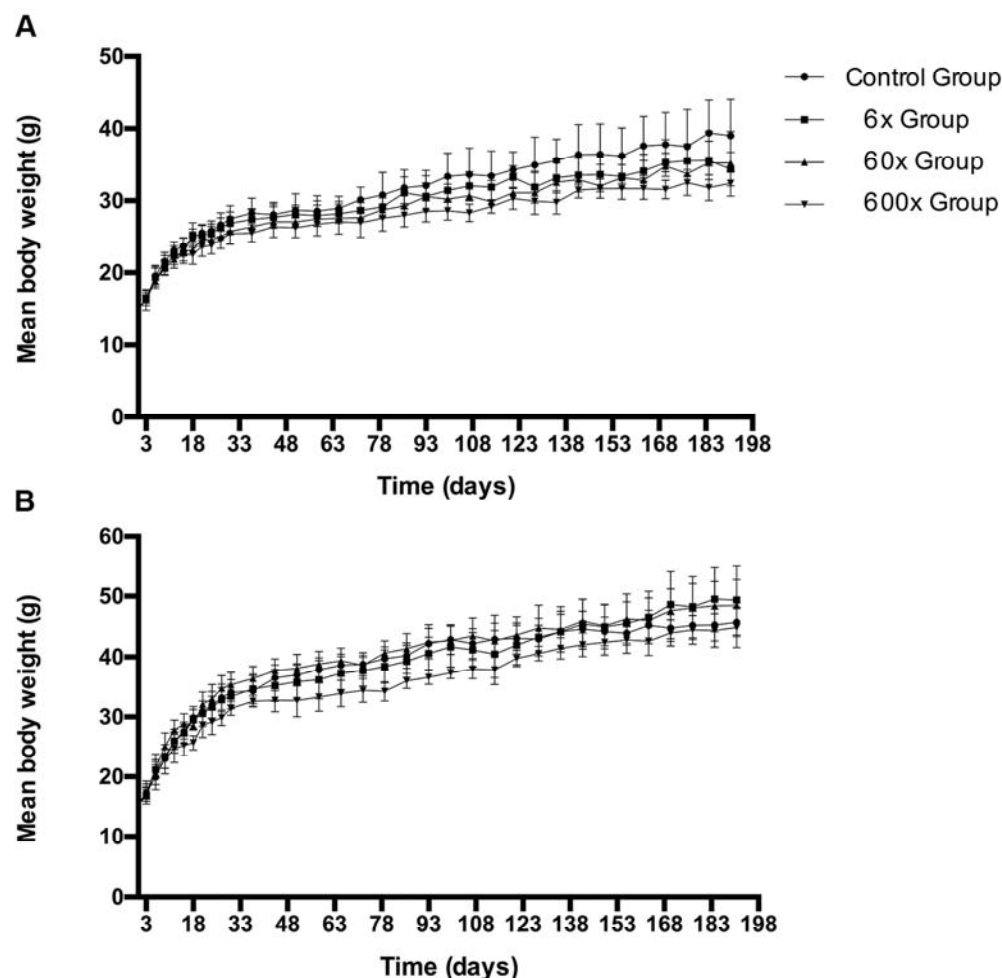

235

236 Figure 1. Mean body weights of mice fed with BPHCT residue in HAFP.

237 The dose level of different groups were: control groups (0.9% saline solution), 6×

238 groups ( $92.5 \mu\text{g } 25 \text{ g}^{-1} \text{ day}^{-1}$ ), 60× dose groups ( $925 \mu\text{g } 25 \text{ g}^{-1} \text{ day}^{-1}$ ) and 600× dose

239 groups ( $9.25 \text{ mg } 25 \text{ g}^{-1} \text{ day}^{-1}$ ) for 6 months. A. Mean body weights of female test mice.

240 B. Mean body weights of male test mice. The data were expressed in mean±SD.

### 241 3.3.2 Effect of chronic BPHCT administration on the biochemical serum parameters

242 The biochemical parameter profiles from control and treated mice are shown in Table

243 2. The level of IgE, IL-4 and 13 in both genders were raised compared with those in the

244 control groups, but these data did not present significant difference to the data in the

245 control groups (Table 3).

246

247 Table 2. Effect of 6 months oral administration of BPHCT residue in HAFP on the

248 biochemical values of serum in mice

| Parameters    | Control          | 6×              | 60×              | 600×            |
|---------------|------------------|-----------------|------------------|-----------------|
| <i>Female</i> |                  |                 |                  |                 |
| BUN           | 10.70±4.02       | 11.96±3.05      | 12.15±2.19       | 11.01±2.67      |
| CREA          | 15.20±2.30       | 16.90±2.60      | 14.70±2.41       | 15.20±2.78      |
| TC            | 2.38±0.56        | 2.49±0.71       | 2.12±0.75        | 2.71±0.52       |
| TBIL          | 1.75±0.33        | 2.27±0.44*      | 2.47±0.54**      | 2.53±0.51**     |
| DBIL          | 0.85±0.29        | 0.93±0.31       | 0.98±0.29        | 0.97±0.40       |
| IBIL          | 0.90±0.37        | 1.34±0.26**     | 1.49±0.45**      | 1.56±0.28**     |
| TP            | 56.60±3.27       | 55.60±2.55      | 56.30±2.87       | 57.20±3.58      |
| ALB           | 28.40±0.97       | 27.80±1.62      | 29.30±0.95       | 29.60±0.97*     |
| GLO           | 27.80±2.44       | 27.80±2.04      | 26.80±1.93       | 27.60±2.88      |
| ALT           | 35.60±7.57       | 35.10±7.58      | 42.70±7.17*      | 48.20±6.71**    |
| AST           | 129.40±41.39     | 120.30±20.26    | 127.40±24.86     | 140.30±32.31    |
| ALP           | 74.20±19.01      | 88.00±27.09     | 116.20±38.29**   | 96.80±30.51     |
| GLU           | 5.56±0.52        | 5.24±1.02       | 5.22±0.55        | 5.36±0.72       |
| CHE           | 10905.10±2195.43 | 9653.40±2427.30 | 10433.10±1230.10 | 9399.20±1956.07 |
| Na            | 157.85±2.03      | 156.18±2.39     | 157.97±2.53      | 156.91±1.36     |
| K             | 6.67±0.63        | 7.44±0.84**     | 7.27±0.51*       | 6.70±0.51       |
| <i>Male</i>   |                  |                 |                  |                 |
| BUN           | 10.61±3.76       | 8.88±1.72       | 10.15±2.39       | 13.62±3.41*     |
| CREA          | 18.20±4.89       | 17.00±2.54      | 19.80±2.49       | 21.30±1.83*     |
| TC            | 3.49±0.72        | 3.49±0.57       | 3.78±0.58        | 3.50±0.57       |
| TBIL          | 2.97±0.55        | 3.04±0.50       | 3.17±0.50        | 3.06±1.60       |
| DBIL          | 1.10±0.31        | 0.90±0.36       | 1.03±0.24        | 1.17±0.54       |
| IBIL          | 1.87±0.46        | 2.14±0.33       | 2.14±0.44        | 1.99±0.58       |
| TP            | 52.90±4.04       | 55.70±5.85      | 56.20±4.34       | 54.20±4.49      |
| ALB           | 24.90±0.99       | 26.60±1.51**    | 27.10±1.10**     | 26.40±0.97**    |
| GLO           | 27.80±2.53       | 29.10±2.51      | 29.30±1.64       | 28.10±1.20      |
| ALT           | 67.00±24.72      | 44.20±5.90**    | 39.10±9.26**     | 42.20±8.97**    |
| AST           | 184.60±37.13     | 139.20±28.51**  | 121.10±19.23**   | 136.20±32.91**  |

|     |                 |                 |                 |                 |
|-----|-----------------|-----------------|-----------------|-----------------|
| ALP | 75.20±27.78     | 87.00±31.02     | 64.90±18.55     | 69.00±20.59     |
| GLU | 4.55±1.27       | 6.53±1.26**     | 4.52±1.54       | 4.90±1.75       |
| CHE | 4245.50±1312.27 | 4903.40±1643.02 | 5539.00±1821.32 | 4676.30±1819.22 |
| Na  | 160.03±2.42     | 158.49±2.93     | 158.98±3.02     | 159.49±2.10     |
| K   | 6.76±0.77       | 7.44±0.63*      | 7.55±0.74*      | 7.25±0.78       |

The BPHCT with beef were offered daily to mice (n=10 per group) by feeding orally at the dose level: 6× groups, 60× groups and 600× groups, normal diets with cooked beef and 0.9% saline solution serve as the control groups. The data were expressed in mean±SD.

\*Significantly different from control group at P < 0.05. \*\*Significantly different from control group at P < 0.01.

BUN=blood urea nitrogen (mmol L<sup>-1</sup>), CREA=creatinine (umol L<sup>-1</sup>), TC=total cholesterol (mmol L<sup>-1</sup>), TBIL= total bilirubin (μmol L<sup>-1</sup>), DBIL= direct bilirubin (μmol L<sup>-1</sup>), IBIL=indirect bilirubin (μmol L<sup>-1</sup>), TP=total protein (g L<sup>-1</sup>), ALB=albumin (g L<sup>-1</sup>), GLO=globulin (g L<sup>-1</sup>), ALT=alanine aminotransferase (U L<sup>-1</sup>), AST=aspartate aminotransferase (U L<sup>-1</sup>), ALP=alkaline phosphatase (U L<sup>-1</sup>), GLU=glucose (mmol L<sup>-1</sup>), CHE=cholinesterase (U L<sup>-1</sup>), NA=sodium (mmol L<sup>-1</sup>), K=potassium (mmol L<sup>-1</sup>).

Table 3. Effect of 6 months oral administration of BPHCT residue in HAFP on the contents of Immunoglobulin E and Interleukins in the serum of mice

| Dose level |                              |        | Control    | 6×          | 60×        | 600×        |
|------------|------------------------------|--------|------------|-------------|------------|-------------|
| Parameters | IgE (μg ml <sup>-1</sup> )   | Male   | 4.50±2.05  | 3.82±3.99   | 5.43±4.81  | 5.36±3.21   |
|            |                              | Female | 5.24±6.33  | 4.78±5.59   | 4.51±2.03  | 6.17±5.30   |
|            | IL-4 (pg ml <sup>-1</sup> )  | Male   | 22.56±4.55 | 23.60±11.37 | 26.63±5.11 | 25.93±5.53  |
|            |                              | Female | 17.85±1.49 | 18.93±2.82  | 18.63±0.87 | 19.16±2.37  |
|            | IL-13 (pg ml <sup>-1</sup> ) | Male   | 20.54±1.47 | 19.66±0.53  | 21.02±1.73 | 28.60±13.04 |
|            |                              | Female | 21.32±3.34 | 26.77±12.32 | 25.43±9.04 | 25.09±13.22 |

Data were expressed in mean±SD, n=7.

\*Significantly different from control group at P < 0.05. \*\*Significantly different from control group at P < 0.01.

### 3.3.3 Effect of chronic BPHCT administration on Organ ratios and Histopathology

The data of organ ratios from control and treated mice are shown in the Table 4. The brain ratios in male and female test mice were increased but were not statistically different.

Table 4. Effect of 6 months oral administration of BPHCT residue in HAFP on the organ to body weight ratio in mice

| Dose level |        |  | Control      | 6×           | 60×          | 600×           |
|------------|--------|--|--------------|--------------|--------------|----------------|
| Brain      | Male   |  | 11.00±1.13   | 10.39±2.14   | 11.32±1.42   | 11.36±1.69     |
|            | Female |  | 13.01±1.27   | 14.61±1.42   | 14.56±2.83   | 14.96±1.09     |
| Heart      | Male   |  | 7.16±2.11    | 6.72±1.06    | 6.95±1.14    | 6.27±1.00      |
|            | Female |  | 6.51±1.69    | 6.58±1.25    | 6.14±1.18    | 6.82±1.14      |
| Liver      | Male   |  | 45.64±5.81   | 40.69±7.87   | 38.85±2.67** | 41.36±4.56     |
|            | Female |  | 44.76±11.10  | 46.49±4.73   | 41.44±4.60   | 45.63±3.83     |
| Spleen     | Male   |  | 2.98±0.52    | 2.52±0.60    | 2.61±0.76    | 3.29±1.18      |
|            | Female |  | 3.07±0.79    | 3.58±0.54    | 3.61±0.44*   | 3.91±0.49**    |
| Lungs      | Male   |  | 7.15±1.11    | 6.99±0.48    | 6.44±1.06    | 6.66±0.88      |
|            | Female |  | 7.24±1.13    | 8.00±1.05    | 7.18±1.14    | 7.31±0.72      |
| Kidneys    | Male   |  | 16.46±2.27   | 16.26±1.64   | 15.79±2.02   | 16.05±2.25     |
|            | Female |  | 12.34±1.85   | 13.58±1.37   | 13.75±1.74   | 13.28±1.38     |
| Intestine  | Male   |  | 76.48±7.56   | 76.76±5.86   | 80.66±6.61   | 87.09±16.25*   |
|            | Female |  | 101.69±11.36 | 100.49±12.97 | 106.35±16.38 | 118.02±10.36** |
| Testes     | Male   |  | 7.11±1.19    | 7.14±1.35    | 7.33±2.31    | 6.66±1.67      |

Data were showed with means±SD. The organ ratios were calculated using organ weight/body weight × 1000, n=10.

\*Significantly different from control group at P< 0.05. \*\*Significantly different from control group at P< 0.01.

In the 600× dose group, diffusely hepatocytes showed eosinophilic granular cytoplasm, individual hepatocyte, necrosis, lymphocytic and histiocytic inflammatory infiltrate in the liver parenchyma (Figure 2). The pulmonary changes consisted of multifocal lymphocytic, histiocytic and plasmacytic inflammatory infiltration in the parenchyma (Figure 3). Furthermore, in the testis, seminiferous tubules were absent or fewer cellular than the control cases, while the interstitium was broadened. There was diffuse severe necrosis of the spermatogenic lineage cells, decreased number of sustentacular cells and spermatids were absent or infrequent (Figure 4). The changes mentioned above were found in 30% percentage of mice in 600× dose group.

281 Histopathological changes were not found in the control and 6× dose groups and few in  
282 the 60× dose groups after 6 months treatment.

283

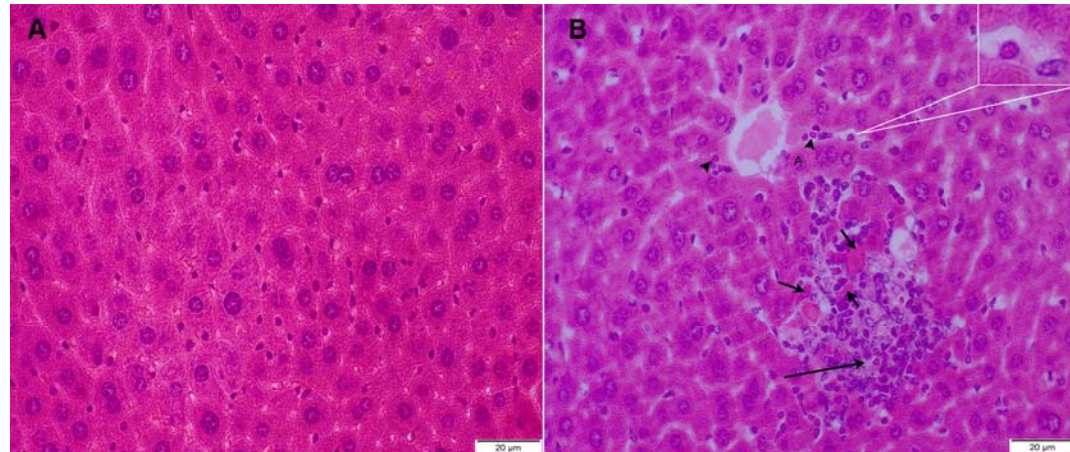

284

285 Figure 2. Histopathological changes in the liver tissue from control group (A) and 600×  
286 dose group (B) (× 400).

287 The lymphocytic and histiocytic inflammatory infiltration (long arrow), necrosis  
288 hepatocyte (short arrows) and eosinophilic granular cytoplasm (arrow head and the  
289 magnified box) were observed in the liver parenchyma in the 600× dose group. No  
290 characteristic histopathological changes were observed in the liver of the control mice.

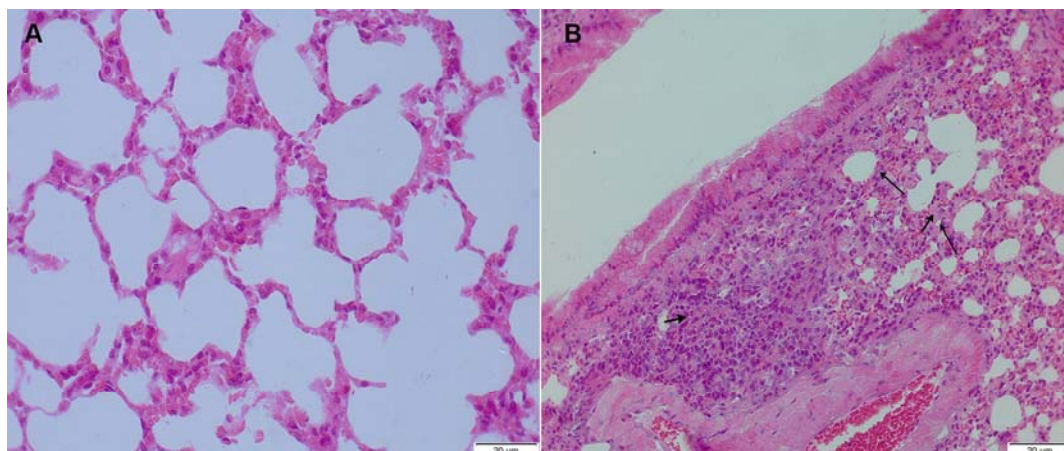

291



Figure 3. Histopathological changes in the pulmonary tissue from control group (A) and 600× dose group (B) ( $\times 400$ ). Multifocal lymphocytic (long arrow), histiocytic and plasmacytic inflammatory infiltration (short arrows) were observed in the parenchyma in the 600× dose group. No characteristic histopathological changes were observed in pulmonary tissue of the control mice.

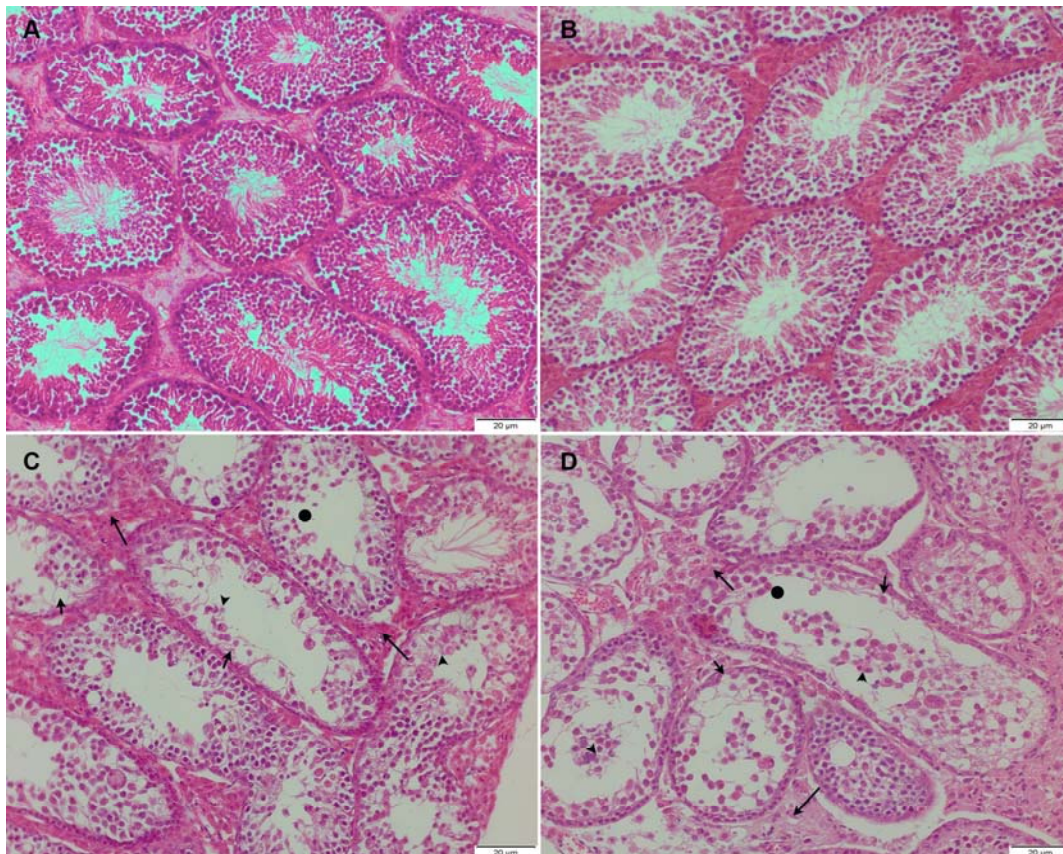

Figure 4. Histopathological changes in the testis tissue from control group (A), 6× group (B), 60× dose group (C) and 600× dose group (D) ( $\times 400$ ). In the 600× dose groups, seminiferous tubules (long arrows) were loosened and interstitial broadening. The decreased population of sustentacular cells (short arrows), necrotic spermatids (arrow head) and the fewer spermatids remained within the lobules (the circles) were observed. While, these histopathological changes could be observed less in



the 60× dose group. No characteristic histopathological changes were observed in testis of Control and 6× groups.

### 3.3.4 Effect of chronic BPHCT administration on sperm aberration rate

Several sperm abnormalities including hookless and amorphous were observed with a high frequency in the 60× and 600× dose groups, and at a lower frequency in the 6× dose group administered with BPHCT residue in HAFP orally for 6 months (Figure 5, Table 5).

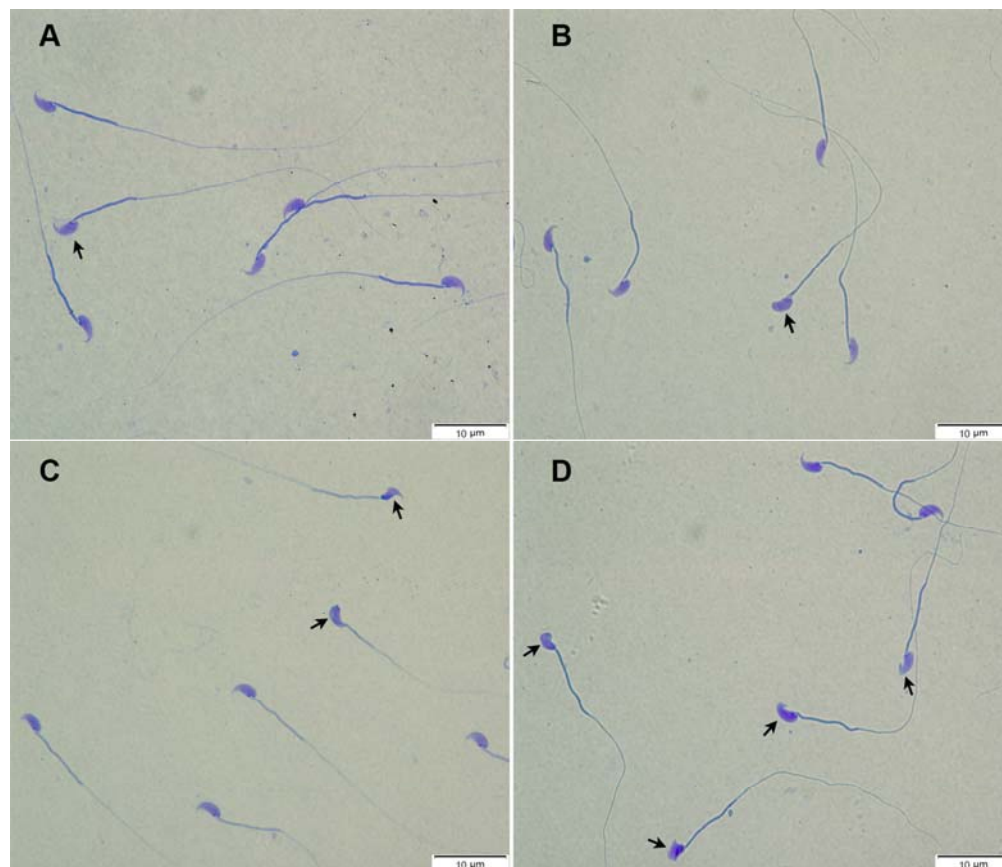

Figure 5. Selected microphotographs of sperms in male mice after 6 months oral administration of BPHCT residue in HAFP (×1000).

316 Compared with the control (A) and 6× (B) groups, a significant increase in the sperm  
317 aberration rate, such as hookless or amorphous acrosome (short arrows), were observed  
318 in the 60× (C) and 600× (D) dose groups.

319

320 Table 5. Effect of 6 months oral administration of BPHCT residue in HAFP on  
321 aberration rates of sperm in male mice and polychromatic erythrocyte micronucleus  
322 formation rates in female mice

| Dose level | Frequency of aberration (%) | MNPCE (%)    |
|------------|-----------------------------|--------------|
| Control    | 1.68±0.22                   | 8.69±1.19    |
| 6×         | 2.11±0.65                   | 10.52±1.33   |
| 60×        | 9.35±1.30**                 | 10.23±4.08   |
| 600×       | 19.41±3.28**                | 15.97±1.13** |

323 Data were expressed in mean±SD, 5000 cells/group, n=5, MNPCE= micronucleated polychromatic erythrocytes.

324 \*Significantly different from control group at P < 0.05. \*\*Significantly different from control group at P < 0.01.

325

### 326 3.3.5 Effect of chronic BPHCT administration on Polychromatic erythrocyte 327 micronucleus formation

328 Compared with the control group, no statistically significant increase in the  
329 micronucleus formation was observed in mice feed with experimental diets in 6× and  
330 60× dose of BPHCT for 6 months (Table 5). However, the rate of micronucleus  
331 formation was readily increased in the 600× dose BPHCT group compared with those in  
332 the control group (Figure 6).

333

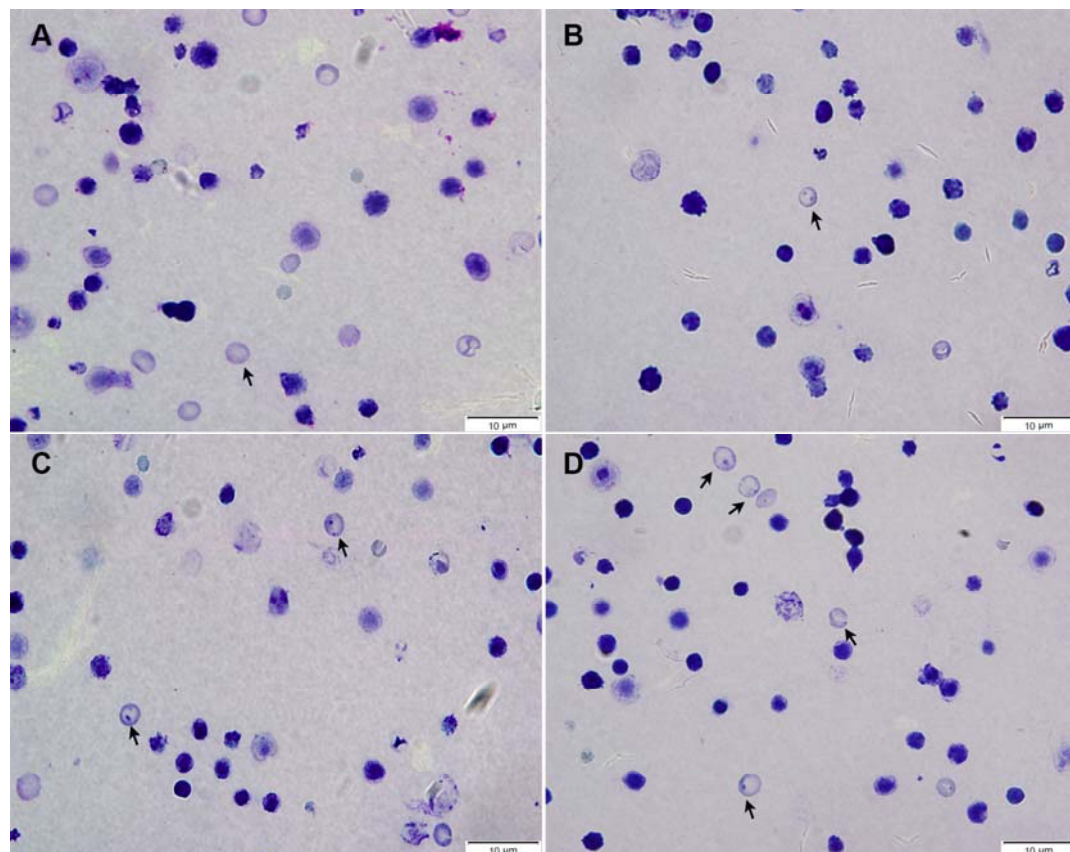

334

335 Figure 6. Selected microphotographs of polychromatic erythrocyte micronucleus in  
 336 female mice after 6 months oral administration of BPHCT residue in HAFP ( $\times 1000$ ).  
 337 A (Control group) presents few polychromatic erythrocyte micronucleus, short arrow  
 338 shows the normal polychromatic erythrocytes in the picture. B ( $6\times$  group) and C ( $60\times$   
 339 dose group) present a lower rate of polychromatic erythrocyte micronucleus (short  
 340 arrows) formation. A significant increase in the micronucleus formation was observed  
 341 in D ( $600\times$  dose group). One or two micronucleus could be observed in one cell.

#### 342 4. Discussion

343 Recent studies have showed that animal derived products containing penicillin  
 344 residues exceeding the regulatory safety level have caused an increasing health concern  
 345 to consumers globally (Baynes et al., 2016). Many studies have demonstrated that the

346 structure of penicillin is unstable at high temperatures (Tian et al., 2017). However, very  
 347 few studies have reported the toxicity of penicillin heated to cooking temperature, and  
 348 the safety of penicillin residues in HAFP. Hence, assessment of the toxicity of penicillin  
 349 residues in HAFP is required and necessary to advise protocols pertaining to public  
 350 health. In this study, the toxic effects of BPHCT residue were investigated in a mouse  
 351 model.

352 In the acute toxicity study, the LD<sub>50</sub> of BPHCT was 933.04 mg kg<sup>-1</sup>. A previous study  
 353 reported that the LD<sub>50</sub> of BPG was 3500 mg kg<sup>-1</sup> injected intraperitoneally (Hobby,  
 354 1968). The result suggested that the toxicity of BPHCT was 3.75 times higher than its  
 355 prototype.

356 It has been reported that a decrease in body weight has been used to demonstrate the  
 357 adverse effects of chemicals and drugs (Teo et al., 2002). In the chronic toxicity study,  
 358 we suggest that the decreases in the mean body weights in test mice were the result of  
 359 the adverse effects caused by BPHCT. However, the reason for the promotion of growth  
 360 in 60× dose male group was not clear, which should be subject to further investigation.  
 361 Abnormal activity and crawling in circles are likely to be neurological symptoms, which  
 362 may lead to the suppression of body weight growth in the test animals. The BPHCT  
 363 residues in HAFP may possibly be responsible for the decreased growth and abnormal  
 364 symptoms in the test mice.

365 Haematological analysis is a relevant part of toxicity evaluation for its higher  
 366 predictive value for human toxicity (Olson et al., 2000). The levels of BUN and CREA  
 367 in serum are important markers for kidney damage. The level of BUN increases when  
 368 the blood volume and Glomerular Filtration Rate decrease (Lee et al., 2007). The level  
 369 of CREA increases as the filtration rate decreases (Wang et al., 2015a). Present results  
 370 showed that the levels of BUN and CREA in the serum of 600× dose male group but

not the female group were significantly increased compared with those in the control group. High levels of BUN and CREA indicated that BPHCT in HAFP might affect the Glomerular Filtration function and even cause the kidney damage or necrosis to male kidney cells.

The two transaminases AST and ALT are used as biomarkers to evaluate the function of liver and their elevated values in the serum are indicative of liver damage (Tennekoon et al., 1991). Our results showed increased levels of ALT, AST in female test mice compared with those in the control group, indicating liver damage in these animals. Apart from ALT and AST, the other biomarker-TBIL, is also used to evaluate liver function. TBIL is consisted of DBIL and IBIL, and a high bilirubin concentration may indicate the liver dysfunction (Wang et al., 2014). In our study, these serum parameters changed markedly in test mice compared with those in control groups, which indicated that the liver function might be affected in BPHCT treated mice. Taken together, the results suggested that high dose of BPHCT residues might be toxic to liver, affecting liver function.

Histopathological assessment of the liver showed that the hepatocyte granular cytoplasm, necrotic changes and hepatitis were found in liver tissues in mice in the 600× dose cohort. These histopathological findings may have a correlation with changes in the level of ALT, AST and the bilirubin in the serum of 600× dose mice. These evidences may prove the potential hepatotoxicity of BPHCT. According to our UPLC-MS/MS results, BPG broke down to form benzylpenicillenic acid, N-(phenylacetyl)glycine, isobenzylpenillic acid, benzylpenillic acid, benzylpenicilloic acid and polymers that similar to the result reported previously (Depaolis et al., 1977). These degradation products are highly immunogenic agents due to the rupture of  $\beta$ -lactam ring and the penicilloyl group formation, which bind with protein via a covalent bond to

396 form a completed antigen (Levine and Price, 1964; Wal et al., 1975). We theorised that  
 397 the inflammatory cell infiltration and consolidation changes in lungs might be the result  
 398 of increasing inflammatory cell stimulated by penicillin degradation products binding  
 399 proteins. According to our results, parameters of IgE and interleukins in the test groups  
 400 increased with different degrees but not significantly. Here, we hypothesise that the  
 401 presence of relatively high level of IgE and interleukins in the serum could be specific  
 402 for the degradation products of BPHCT. Interestingly, we didn't find obvious  
 403 histopathological evidence in the brain to explain the neurological symptoms of test  
 404 mice. However, it had been reported that penicillin was neurotoxic (Nicholls, 1980).  
 405 The observed neurological signs of test mice should not be ignored and the mechanism  
 406 needs further elucidation.

407 We know that naturally occurring mistakes or exogenous factors such as genotoxicity  
 408 chemicals and irradiation may cause sperm aberration or spermatogenic dysfunction  
 409 during the differentiation (Bruce et al., 1974). In our test, we observed that the sperm  
 410 aberration rates in the 60× and 600× feeding groups were significantly increased  
 411 compared with those of the control group. The two test groups displayed characteristic  
 412 shapes indicating morphological changes, including hookless and amorphous heads.  
 413 This suggests that high concentration of BPHCT residue might affect spermatogenic  
 414 tissues. The histopathological study of the testis also showed dead spermatogonia cells  
 415 and the decreased population of sertoli and sperm cells in spermatogenic tissues, which  
 416 are the evidence to support the possible toxicity of BPHCT on spermatogenic tissues in  
 417 mice. On the other hand, the micronucleus assay is considered a preferred method for  
 418 assessment of genotoxic effect and chromosome damage caused by exposure to ionizing  
 419 radiation or carcinogenic chemicals (Chauhan et al., 2000; Fenech, 2000). Multiple  
 420 micronuclei may form as the chromosome lagged behind and fail to incorporate into

421 daughter nuclei during the anaphase of mitosis. In the polychromatic erythrocyte  
422 micronucleus assay, the formation rate of micronucleus in the bone marrow cells from  
423 600× dose group increased significantly compared with that of the control group. Based  
424 on our results, we suggest that higher dose of BPHCT residue might interfere a lagging  
425 acentric chromosome fragment and be a potential genotoxicity agent. Therefore, our  
426 results suggested that sperm aberration and micronucleus formation caused by  
427 degradation products of BPHCT in mice indicates possibilities of sperm toxicity and  
428 genotoxicity.

429 This work has clearly demonstrated potential toxic effects of BPHCT *in vivo*. We  
430 investigated the potential toxicity of HAFP contaminated with penicillin residues, which  
431 has not been studied and remained as a blind spot of the public health authorities and  
432 consumers. The five major thermal degradation products of BPHCT contain different  
433 functional groups such as carboxyl-, hydroxyl-, sulfhydryl- and carbonyl- group etc.,  
434 which could explain the observed toxicity in mice. Polymers formed in the process also  
435 need to be paid more attention to due to their complex structures. Among these  
436 products, only the toxicity of benzylpenicilloic acid has been evaluated *in vivo* and *in*  
437 *vitro* (Cui et al., 2018). More studies are needed to address the toxic effects of these  
438 degradation products of BPHCT.

439 According to our pilot study, we found that low dose of BPHCT doesn't show toxic  
440 effects in mice. The high doses of BPG (60× and 600× dose) were used in the chronic  
441 study to evaluate the potential toxicity after heat treatment but not death or severe  
442 suffering based on the OECD guidelines, even though the concentration is significantly  
443 higher than those observed in the environment. In some countries, especially in  
444 developing countries and some rural areas, BPG residues are a major issue due to its  
445 illegal use and poor management of withdrawal period (Babapour et al., 2012).



446 Therefore, the possibility of exposing high dose of BPG residues to the public should  
447 not be ignored.

448 In another aspect, there are huge differences in the policies of penicillin usage and  
449 residues levels worldwide. Present results may be not valuable to those countries that do  
450 not allow the use of penicillin in animal husbandry. Nevertheless, this study  
451 systematically reported the toxicity of penicillin residues in animal derived products  
452 heated to cooking temperature and their potential threats to public health. It also  
453 suggested that although rarely reported, the potential harm posed by other antibiotic  
454 residues in food should be investigated.

## 455 **5. Conclusions**

456 In summary, the toxicity of BPG is increased by over 3.75 times as a result of heat-  
457 treatment. The BPG has no significant side effect at the 6× dose level in edible animal  
458 tissue after heat-treatment. However, over 60× or 600× dose level may lead to various  
459 toxicities, particularly the potential hepatotoxicity and pulmonary toxicity, as well as  
460 sperm aberration and micronucleus formation after long time exposure. Taking the  
461 thermal process into account, this study provides the toxicity evaluation of antibiotics  
462 residue in animal derived products, which would inform the legislation on antibiotic  
463 usage guidelines. It is necessary for the government to perform a strict supervision and  
464 withdrawal period on the use of penicillin and other heat-unstable antibiotics in animal  
465 husbandry.

466

## 467 **Acknowledgements**

468 We thank Dr. Mark. A. Holmes (University of Cambridge, Dept of Veterinary  
469 Medicine, Madingley Road, Cambridge CB3 0ES, UK) for kindly revising the



470 manuscript. This work was supported by the National Natural Science Foundation of  
 471 Jilin Province, P.R.China (grant no. 201701035JC) and Key Projects of Jilin Province  
 472 Science and Technology Development Plan (20140204065NY). Cheng Cui was  
 473 supported by the China Scholarship Council.

474

475 Conflict of interest

476 The authors declare that they have no conflicts of interest.

477

478

479

480

481

482

483

484

485

486

487

488

489

490

491

492

493

494

## 495      **Reference**

- 496      Aarestrup, F.M., Wegener, H.C., Collignon, P., 2008. Resistance in bacteria of the food  
497      chain: epidemiology and control strategies. *Expert Rev Anti-Infe* 6, 733-750.
- 498      Babapour, A., Azami, L., Fartashmehr, J., 2012. Overview of antibiotic residues in  
499      beef and mutton in Ardebil, North West of Iran. *World Applied Sci J* 19, 1417-1422.
- 500      Barton, M.D., 2000. Antibiotic use in animal feed and its impact on human health.  
501      *Nutr Res Rev* 13, 279-299.
- 502      Baynes, R.E., Dedonder, K., Kissell, L., Mzyk, D., Marmulak, T., Smith, G., Tell, L.,  
503      Gehring, R., Davis, J., Riviere, J.E., 2016. Health concerns and management of select  
504      veterinary drug residues. *Food Chem Toxicol* 88, 112-122.
- 505      Becker, M., Zittlau, E., Petz, M., 2004. Residue analysis of 15 penicillins and  
506      cephalosporins in bovine muscle, kidney and milk by liquid chromatography-  
507      tandem mass spectrometry. *Analytica Chimica Acta* 520, 19-32.
- 508      Bruce, W.R., Furrer, R., Wyrobek, A.J., 1974. Abnormalities in the shape of murine  
509      sperm after acute testicular X-irradiation. *Mutat Res-Fund Mol M* 23, 381-386.
- 510      Chauhan, L., Pant, N., Gupta, S., Srivastava, S., 2000. Induction of chromosome  
511      aberrations, micronucleus formation and sperm abnormalities in mouse following  
512      carbofuran exposure. *Mutat Res-Fund Mol M* 465, 123-129.
- 513      Chiesa, O., Von Bredow, J., Smith, M., Heller, D., Condon, R., Thomas, M., 2006.  
514      Bovine kidney tissue/biological fluid correlation for penicillin. *J Vet Pharmacol*  
515      *Ther* 29, 299-306.
- 516      Commission, C.A., 2009. Maximum Residue Limits for Veterinary Drugs in Foods  
517      Updated at the 32nd Session of the Codex Alimentarius Commission (July 2009).  
518      CAC/MRL, 35.
- 519      Cui, C., Lu, H.J., Hui, Q., Lu, S.Y., Liu, Y., Ahmad, W., Wang, Y., Hu, P., Liu, X.L., Cai, Y., Liu,  
520      L.J., Zhang, X., Zhao, K., Li, Y.S., Ren, H.L., Jin, N.Y., Liu, Z.S., 2018. A preliminary  
521      investigation of the toxic effects of Benzylpenicilloic acid. *Food Chem Toxicol* 111,  
522      567-577.
- 523      Dayan, A.D., 1993. Allergy to antimicrobial residues in food: assessment of the risk  
524      to man. *Vet Microbiol* 35, 213-226.
- 525      Depaolis, A.M., Katz, S.E., Rosen, J.D., 1977. Effect of storage and cooking on  
526      penicillin in meat. *J Agr Food Chem* 25, 1112-1115.
- 527      Di Corcia, A., Nazzari, M., 2002. Liquid chromatographic-mass spectrometric  
528      methods for analyzing antibiotic and antibacterial agents in animal food products. *J*  
529      *Chromatogr A* 974, 53-89.
- 530      Dunlop, R.H., McEwen, S.A., Meek, A.H., Friendship, R.A., Clarke, R.C., Black, W.D.,  
531      1998. Antimicrobial drug use and related management practices among Ontario  
532      swine producers. *Can Vet J* 39, 87-96.
- 533      Edwards, S.J., Brownlee, A., 1946. Therapeutic treatment of bovine mastitis. *Vet Rec*  
534      58, 335.
- 535      FDA, 2014. 2011 Summery report on antimicrobials sold or distributed for use in  
536      food-producing animals.
- 537      Fenech, M., 2000. The in vitro micronucleus technique. *Mutat Res-Fund Mol M* 455,  
538      81-95.
- 539      Ghidini, S., Zanardi, E., Varisco, G., Chizzolini, R., 2003. Residues of  $\beta$ -lactam  
540      antibiotics in bovine milk: confirmatory analysis by liquid chromatography tandem  
541      mass spectrometry after microbial assay screening. *Food Addit Contam* 20, 528-  
542      534.

543 Grave, K., Greko, C., Kvaale, M.K., Torrenedo, J., Mackay, D., Muller, A., Moulin, G.,  
544 2012. Sales of veterinary antibacterial agents in nine European countries during  
545 2005-09: trends and patterns. *J Antimicrob Chemoth* 67, 3001-3008.

546 Grunwald, L., Petz, M., 2003. Food processing effects on residues: penicillins in milk  
547 and yoghurt. *Anal. Chim. Acta* 483, 73-79.

548 Guéant-Rodriguez, R.-M., Romano, A., Béri-Dexheimer, M., Viola, M., Gaeta, F.,  
549 Guéant, J.-L., 2006. Gene-gene interactions of IL13 and IL4RA variants in  
550 immediate allergic reactions to betalactam antibiotics. *Pharmacogenet Genom* 16,  
551 713-719.

552 Hobby, G.L., 1968. Antimicrobial agents and chemotherapy. *Am J Med Sci* 252, 47-  
553 90.

554 Junza, A., Dorival-García, N., Zafra-Gómez, A., Barrón, D., Ballesteros, O., Barbosa, J.,  
555 Navalón, A., 2014. Multiclass method for the determination of quinolones and  $\beta$ -  
556 lactams, in raw cow milk using dispersive liquid-liquid microextraction and ultra  
557 high performance liquid chromatography-tandem mass spectrometry. *J*  
558 *Chromatogra A* 1356, 10-22.

559 Kabir, J., Umoh, V., Audu-Okoh, E., Umoh, J., Kwaga, J., 2004. Veterinary drug use in  
560 poultry farms and determination of antimicrobial drug residues in commercial  
561 eggs and slaughtered chicken in Kaduna State, Nigeria. *Food Control* 15, 99-105.

562 Kang'ethe, E., Aboge, G., Arimi, S., Kanja, L., Omore, A., McDermott, J., 2005.  
563 Investigation of the risk of consuming marketed milk with antimicrobial residues  
564 in Kenya. *Food Control* 16, 349-355.

565 Lee, Y.-L., Yen, M.-T., Mau, J.-L., 2007. Antioxidant properties of various extracts  
566 from *Hypsizygus marmoreus*. *Food Chem* 104, 1-9.

567 Levine, B.B., Price, V.H., 1964. Studies on the Immunological Mechanisms of  
568 Penicillin Allergy. II. Antigenic Specificities of Allergic Wheal-and-Flare Skin  
569 Responses in Patients with Histories of Penicillin Allergy. *Immunology* 7, 542-556.

570 Li, M., Gehring, R., Riviere, J.E., Lin, Z., 2017a. Development and application of a  
571 population physiologically based pharmacokinetic model for penicillin G in swine  
572 and cattle for food safety assessment. *Food Chem Toxicol* 107, 74-87.

573 Li, N., Ho, K.W., Ying, G.-G., Deng, W.-J., 2017b. Veterinary antibiotics in food,  
574 drinking water, and the urine of preschool children in Hong Kong. *Environ Int* 108,  
575 246-252.

576 Mund, M.D., Khan, U.H., Tahir, U., Mustafa, B., Fayyaz, A., 2016. Antimicrobial drug  
577 residues in poultry products and implications on public health: a Review. *Int J Food*  
578 *Prop.*

579 Myllyniemi, A.-L., Rannikko, R., Lindfors, E., Niemi, A., Bäckman, C., 2000.  
580 Microbiological and chemical detection of incurred penicillin G, oxytetracycline,  
581 enrofloxacin and ciprofloxacin residues in bovine and porcine tissues. *Food Addit*  
582 *Contam* 17, 991-1000.

583 Nicholls, P., 1980. Neurotoxicity of penicillin. *J Antimicrob Chemoth* 6, 161-165.

584 OECD(2002), Test No. 423: Acute Oral toxicity-Acute Toxic Class Method. OECD  
585 Publishing, Paris.

586 Olson, H., Betton, G., Robinson, D., Thomas, K., Monro, A., Kolaja, G., Lilly, P., Sanders,  
587 J., Sipes, G., Bracken, W., 2000. Concordance of the toxicity of pharmaceuticals in  
588 humans and in animals. *Regul Toxicol Pharm* 32, 56-67.

589 Pawankar, R., Okuda, M., Yssel, H., Okumura, K., Ra, C., 1997. Nasal mast cells in  
590 perennial allergic rhinitis exhibit increased expression of the Fc epsilonRI, CD40L,  
591 IL-4, and IL-13, and can induce IgE synthesis in B cells. *J Clin Invest* 99, 1492-1499.

Payne, M.A., Craigmill, A., Riviere, J.E., Webb, A.I., 2006. Extralabel use of penicillin in food animals. *J Am Vet Med Assoc* 229, 1401-1403.

Pene, J., Rousset, F., Brière, F., Chrétien, I., Bonnefoy, J.-Y., Spits, H., Yokota, T., Arai, N., Arai, K.-I., Banchereau, J., 1988. IgE production by normal human lymphocytes is induced by interleukin 4 and suppressed by interferons gamma and alpha and prostaglandin E2. *P Natl Acad Sci USA* 85, 6880-6884.

Punnonen, J., Aversa, G., Cocks, B.G., McKenzie, A., Menon, S., Zurawski, G., de Waal Malefyt, R., de Vries, J.E., 1993. Interleukin 13 induces interleukin 4-independent IgG4 and IgE synthesis and CD23 expression by human B cells. *P Natl Acad Sci USA* 90, 3730-3734.

Rose, M.D., Bygrave, J., Farrington, W.H., Shearer, G., 1997. The effect of cooking on veterinary drug residues in food. Part 8. Benzylpenicillin. *Analyst* 122, 1095-1099.

Samanidou, V.F., Nisyriou, S.A., Papadoyannis, I.N., 2007. Development and validation of an HPLC method for the determination of penicillin antibiotics residues in bovine muscle according to the European Union Decision 2002/657/EC. *J Sep Sci* 30, 3193-3201.

Tang, Z., Xing, F., Chen, D., Yu, Y., Yu, C., Di, J., Liu, J., 2012. In vivo toxicological evaluation of Anisomycin. *Toxicol Lett* 208, 1-11.

Tennekoon, K.H., Jeevathayaparan, S., Kurukulasooriya, A.P., Karunanayake, E.H., 1991. Possible hepatotoxicity of *Nigella sativa* seeds and *Dregea volubilis* leaves. *J Ethnopharmacol* 31, 283-289.

Teo, S., Stirling, D., Thomas, S., Hoberman, A., Kiorpes, A., Khetani, V., 2002. A 90-day oral gavage toxicity study of d-methylphenidate and d, l-methylphenidate in Sprague-Dawley rats. *Toxicology* 179, 183-196.

Tian, L., Khalil, S., Bayen, S., 2017. Effect of thermal treatments on the degradation of antibiotic residues in food. *Crit Rev Food Sci* 57, 3760-3770.

Wal, J.-M., Bories, G., Mamas, S., Dray, F., 1975. Radioimmunoassay of penicilloyl groups in biological fluids. *FEBS Lett* 57, 9-13.

Wang, E.-T., Chen, D., Liu, H., Yan, H.-Y., Yuan, Y., 2015a. Protective effect of allicin against glycidamide-induced toxicity in male and female mice. *Gen Physiol Biophys* 34, 177-187.

Wang, H., Wang, B., Zhao, Q., Zhao, Y., Fu, C., Feng, X., Wang, N., Su, M., Tang, C., Jiang, F., Zhou, Y., Chen, Y., Jiang, Q., 2015b. Antibiotic Body Burden of Chinese School Children: A Multisite Biomonitoring-based Study. *Environ Sci Technol* 49, 5070-5079.

Wang, T., Zhou, Z.-x., Sun, L.-x., Li, X., Xu, Z.-m., Chen, M., Zhao, G.-l., Jiang, Z.-z., Zhang, L.-y., 2014. Resveratrol effectively attenuates  $\alpha$ -naphthyl-isothiocyanate-induced acute cholestasis and liver injury through choleretic and anti-inflammatory mechanisms. *Acta Pharm Sin* 35, 1527.

Wang, X., Zhang, W., Wang, Y., Peng, D., Ihsan, A., Huang, X., Huang, L., Liu, Z., Dai, M., Zhou, W., 2010. Acute and sub-chronic oral toxicological evaluations of quinocetone in Wistar rats. *Regul Toxicol Pharm* 58, 421-427.

Wyrobek, A., Bruce, W., 1975. Chemical induction of sperm abnormalities in mice. *P Natl Acad Sci USA* 72, 4425-4429.

Zhang, Q.Q., Ying, G.G., Pan, C.G., Liu, Y.S., Zhao, J.L., 2015. Comprehensive evaluation of antibiotics emission and fate in the river basins of China: source analysis, multimedia modeling, and linkage to bacterial resistance. *Environ Sci Technol* 49, 6772-6782.
